# Supplementary material for: Enrichments/Derichments of Root-Associated Bacteria Related to Plant Growth and Nutrition Caused by the Growth of an EPSPS-Transgenic Maize Line in the Field
Source: Front Microbiol. 2019 Jun 18;10:1335. doi: 10.3389/fmicb.2019.01335 (PMC6591461; doi:10.3389/fmicb.2019.01335)
Supplement: Supplementary file 18 [file Table_6.XLSX]

## Sheet: Analysis of similarities
Table S6 Analysis of similarities of the bacterial communities of samples
Group Name (Factor Name)	p value	R value	Level
Z958.FRt_vs_Z958.TRt	0.027	0.969	anosim/genus
CC2.FSS_vs_CC2.TSS	0.027	0.948	anosim/genus
Z958.FSS_vs_Z958.TSS	0.026	0.552	anosim/genus
CC2.FRh_vs_CC2.FSS	0.033	0.958	anosim/genus
Z958.FRh_vs_Z958.FSS	0.024	0.99	anosim/genus
CC2.FSS_vs_Z958.FSS	0.318	0.052	anosim/genus
CC2.FRh_vs_Z958.FRh	0.785	-0.135	anosim/genus
CC2.FRt_vs_Z958.FRt	0.276	0.135	anosim/genus
CC2.TSS_vs_Z958.TSS	0.065	0.25	anosim/genus
CC2.TRh_vs_Z958.TRh	0.489	-0.031	anosim/genus
CC2.TRt_vs_Z958.TRt	0.052	0.333	anosim/genus
CC2.FRh_vs_CC2.TRh	0.022	0.958	anosim/genus
Z958.FRh_vs_Z958.TRh	0.032	0.927	anosim/genus
CC2.FRt_vs_CC2.TRt	0.026	0.896	anosim/genus

## Sheet: different sampling stages
Analysis of similarities in different sampling stages
Group Name (Factor Name)	p value	R value	Level
CC2.F_vs_Z958.F	0.9	-0.062	anosim/genus
CC2.T_vs_Z958.T	0.528	-0.021	anosim/genus
CC2.F_vs_CC2.T_vs_Z958.F_vs_Z958.T	0.024	0.088	anosim/genus

## Sheet: different sampling compartments
Analysis of similarities in different sampling compartments
Group Name (Factor Name)	p value	R value	Level
CC2.SS_vs_Z958.SS	0.697	-0.046	anosim/genus
CC2.Rh_vs_Z958.Rh	0.971	-0.112	anosim/genus
CC2.Rt_vs_Z958.Rt	0.313	0.012	anosim/genus
CC2.Rh_vs_CC2.Rt_vs_CC2.SS_vs_Z958.Rh_vs_Z958.Rt_vs_Z958.SS	0.001	0.588	anosim/genus
