# Supplementary material for: Enrichments/Derichments of Root-Associated Bacteria Related to Plant Growth and Nutrition Caused by the Growth of an EPSPS-Transgenic Maize Line in the Field
Source: Front Microbiol. 2019 Jun 18;10:1335. doi: 10.3389/fmicb.2019.01335 (PMC6591461; doi:10.3389/fmicb.2019.01335)
Supplement: Supplementary file 19 [file Table_7.XLSX]

## Sheet: Table S12 Permutational multiva
Table S7 Permutational multivariate analysis of variance of samples
phenotype	Df	SumsOfSqs	MeanSqs	F.Model	R2	Pr(>F)	Adjust P
CC2.FSS_vs_Z958.FSS	1	0.0122862	0.0122862	0.840308	0.122846	0.492507	0.492507
CC2.FRh_vs_Z958.FRh	1	0.00922082	0.00922082	0.215798	0.0347177	0.957043	0.957043
CC2.FRt_vs_Z958.FRt	1	0.0325617	0.0325617	1.29825	0.177886	0.280719	0.280719
CC2.TSS_vs_Z958.TSS	1	0.078032	0.078032	2.40872	0.286455	0.032967	0.032967
CC2.TRh_vs_Z958.TRh	1	0.025426	0.025426	0.873021	0.127021	0.472527	0.472527
CC2.TRt_vs_Z958.TRt	1	0.0666851	0.0666851	1.77703	0.228497	0.164835	0.164835
CC2.FRh_vs_CC2.TRh	1	0.324173	0.324173	9.72384	0.618414	0.032967	0.032967
Z958.FRh_vs_Z958.TRh	1	0.383759	0.383759	9.96387	0.624151	0.032967	0.032967
CC2.FRt_vs_CC2.TRt	1	0.270603	0.270603	7.26278	0.547606	0.032967	0.032967
Z958.FRt_vs_Z958.TRt	1	0.149111	0.149111	5.88246	0.495054	0.032967	0.032967
CC2.FSS_vs_CC2.TSS	1	0.0819131	0.0819131	6.07713	0.503193	0.032967	0.032967
Z958.FSS_vs_Z958.TSS	1	0.133138	0.133138	3.96979	0.398182	0.032967	0.032967
CC2.FRh_vs_CC2.FSS	1	0.441842	0.441842	18.9672	0.759685	0.032967	0.032967
Z958.FRh_vs_Z958.FSS	1	0.498589	0.498589	14.6407	0.709313	0.032967	0.032967
